## Index to Volume 35

---

### Articles

|                                                                                                                                                                                                                           |     |
|---------------------------------------------------------------------------------------------------------------------------------------------------------------------------------------------------------------------------|-----|
| <b>Bennett, D. B.</b> The effects of pot immersion on catches of crabs, <i>Cancer pagurus</i> L. and lobsters, <i>Homarus gammarus</i> (L.) . . . . .                                                                     | 332 |
| <b>Beukema, J. J.</b> The efficiency of the Van Veen grab compared with the Reineck box sampler. . . . .                                                                                                                  | 319 |
| <b>Boonstra, G. P. and de Groot, S. J.</b> The development of an electrified shrimp-trawl in the Netherlands. . . . .                                                                                                     | 165 |
| <b>Bowers, A. B.</b> Marine fish culture in Britain IX. Growth of cultured plaice to marketable size in the laboratory. . . . .                                                                                           | 149 |
| <b>Boyar, H. C., Marak, R. R., Perkins, F. E. and Clifford, R. A.</b> Seasonal distribution and growth of larval herring ( <i>Clupea harengus</i> L.) in the Georges Bank – Gulf of Maine area from 1962 to 1970. . . . . | 36  |
| <b>Burd, A. C. and Howlett, G. J.</b> Fecundity studies on North Sea herring. . . . .                                                                                                                                     | 107 |
| <b>Campos Rosado, J. M. de.</b> The catch and effort of the Angolan bait-boat tuna fishery and its influence in reducing the supporting yellowfin population . . . . .                                                    | 52  |
| <b>Campos Rosado, J. M. de.</b> Evaluating fish stock changes from the fragmentary catch and effort data of the Angolan fisheries . . . . .                                                                               | 180 |
| <b>Comely, C. A.</b> Seasonal variations in the flesh weights and biochemical content of the scallop <i>Pecten maximus</i> L. in the Clyde Sea area . . . . .                                                             | 281 |
| <b>Corten, A.</b> Recent changes in the stock of Celtic Sea herring ( <i>Clupea harengus</i> L.) . . . . .                                                                                                                | 194 |
| <b>Cram, D. L. and Schülein, F. H.</b> Observations on surface-shoaling Cape hake off South West Africa . . . . .                                                                                                         | 272 |
| <b>Cushing, D. H.</b> Computations with a sonar equation . . . . .                                                                                                                                                        | 22  |
| <b>Dare, P. J.</b> Damage caused to mussels ( <i>Mytilus edulis</i> L.) by dredging and mechanized sorting . . . . .                                                                                                      | 296 |
| <b>Gruffydd, Ll. D.</b> The influence of certain environmental factors on the maximum length of the scallop, <i>Pecten maximus</i> L. . . . .                                                                             | 300 |
| <b>Hancock, D. A.</b> Attraction and avoidance in marine invertebrates – their possible role in developing an artificial bait . . . . .                                                                                   | 328 |
| <b>Harden Jones, F. R., Greer Walker, M. and Arnold, G. P.</b> The movements of a Woodhead seabed drifter tracked by sector scanning sonar. . . . .                                                                       | 87  |
| <b>Harden Jones, F. R. and Scholes, P.</b> The effect of low temperature on cod, <i>Gadus morhua</i> L. . . . .                                                                                                           | 258 |

|                                                                                                                                                                                                                                   |     |
|-----------------------------------------------------------------------------------------------------------------------------------------------------------------------------------------------------------------------------------|-----|
| <b>Hennig, H. F. K. O.</b> The effect of a larval <i>Anisakis</i> (Nematoda: Ascaroidea) on the South West African anchovy, <i>Engraulis capensis</i> . . . . .                                                                   | 185 |
| <b>Hill, H. W. and Horwood, J. W.</b> A computer simulation of surface drifter returns . . . . .                                                                                                                                  | 158 |
| <b>Holden, M. J. and Vince, M. R.</b> Age validation studies on the centra of <i>Raja clavata</i> using tetracycline. . . . .                                                                                                     | 13  |
| <b>Holden, M. J. and Tucker, R. N.</b> The food of <i>Raja clavata</i> Linnaeus 1758, <i>Raja montagui</i> Fowler 1910, <i>Raja naevus</i> Müller and Henle 1841 and <i>Raja brachyura</i> Lafont 1873 in British waters. . . . . | 189 |
| <b>Howell, B. R.</b> Marine fish culture in Britain VIII. A marine rotifer, <i>Brachionus plicatilis</i> Müller, and the larvae of the mussel, <i>Mytilus edulis</i> L., as foods for larval flatfish . . .                       | 1   |
| <b>Jones, R.</b> The rate of elimination of food from the stomachs of haddock <i>Melanogrammus aeglefinus</i> L., cod <i>Gadus morhua</i> and whiting <i>Merlangius merlangus</i> . . . . .                                       | 225 |
| <b>Kroger, R. L., Sekavec, G. and Levi, E. J.</b> Loss of ferromagnetic tags when injected into the air bladder and abdominal cavity of Atlantic menhaden, <i>Brevoortia tyrannus</i> . . . . .                                   | 244 |
| <b>Lenz, J.</b> On the occurrence of the ctenophore <i>Bolinopsis infundibulum</i> (O. F. Müller) in the Western Baltic. . . . .                                                                                                  | 32  |
| <b>Lindquist, A. and Hannerz, L.</b> Migrations of the mackerel in the northern North Sea and in the Skagerak . . . . .                                                                                                           | 276 |
| <b>Lockwood, S. J.</b> The use of a modified Gulf V plankton sampler from a small open boat                                                                                                                                       | 171 |
| <b>Lockwood, S. J.</b> The use of the von Bertalanffy growth equation to describe the seasonal growth of fish. . . . .                                                                                                            | 175 |
| <b>Marchand, M.</b> Considérations sur les formes physico-chimiques du cobalt, manganèse, zinc, chrome et fer dans une eau de mer enrichie ou non de matière organique. . . . .                                                   | 130 |
| <b>Munro, J. L.</b> The mode of operation of Antillean fish traps and the relationships between ingress, escapement, catch and soak . . . . .                                                                                     | 337 |
| <b>Omori, M., Konagaya, T. and Noya, K.</b> History and present status of the fishery of <i>Sergeste lucens</i> (Penaeida, Decapoda, Crustacea) in Suruga Bay, Japan . . . . .                                                    | 61  |
| <b>Postuma, K. H.</b> The nucleus of the herring otolith as a racial character . . . . .                                                                                                                                          | 121 |
| <b>Rommel, S. A., Jr. and McCleave, J. D.</b> Prediction of oceanic electric fields in relation to fish migration. . . . .                                                                                                        | 27  |
| <b>Saraiva, M. C.</b> Étude sur la radiosensibilité d'un Copépode benthique, <i>Tigriopus fulvus</i> (Fischer). . . . .                                                                                                           | 7   |
| <b>Steedman, H. F.</b> Laboratory methods in the study of marine zooplankton. A summary report on the results of the Joint Working Group 23 of SCOR and UNESCO, 1968-1972 . . . . .                                               | 351 |
| <b>Stewart, P. A. M.</b> An investigation into the effects of electric fields on <i>Nephrops norvegicus</i> . . . . .                                                                                                             | 249 |
| <b>Szekielda, K.-H.</b> Validity of ocean surface temperatures monitored from satellites . . . . .                                                                                                                                | 78  |
| <b>Szekielda, K.-H., Shenk, W. E. and Salomonson, V. V.</b> Variability of sea-surface temperatures of the southern Indian Ocean . . . . .                                                                                        | 143 |
| <b>Walne, P. R. and Spenser, B. E.</b> Experiments on the growth and food conversion efficiency of the spat of <i>Ostrea edulis</i> L. in a recirculation system. . . . .                                                         | 303 |
| <b>Windom, H., Taylor, F. and Stickney, R.</b> Mercury in North Atlantic plankton. . . . .                                                                                                                                        | 18  |

## Short Notes

|                                                                                                                                                                                                                     |               |
|---------------------------------------------------------------------------------------------------------------------------------------------------------------------------------------------------------------------|---------------|
| <b>Agger, P., Boëtius, I. and Lassen, H.</b> Error in the Virtual Population Analysis: the effect of uncertainties in the natural mortality coefficient. . . . .                                                    | 93            |
| <b>Banning, P. van.</b> Two remarkable infestations by <i>Lernaeocera</i> spp. (Copepoda parasitica)                                                                                                                | 205           |
| <b>Burrell, V. G., Jr., Van Engel, W. A. and Hummel, S. G.</b> A new device for subsampling plankton samples . . . . .                                                                                              | 364           |
| <b>Gabbott, P. A. and Stephenson, R. R.</b> A note on the relationship between the dry weight condition index and the glycogen content of adult oysters ( <i>Ostrea edulis</i> L.) kept in the laboratory . . . . . | 359           |
| <b>Gardner, D. and Riley, J. P.</b> Mercury in the Atlantic around Iceland . . . . .                                                                                                                                | 202           |
| <b>Gruffydd, Ll. D.</b> An estimate of natural mortality in an unfished population of the scallop <i>Pecten maximus</i> (L.) . . . . .                                                                              | 209           |
| <b>Harden Jones, F. R.</b> Tail beat frequency, amplitude, and swimming speed of a shark tracked by sector scanning sonar. . . . .                                                                                  | 95            |
| <b>Harden Jones, F. R. and Scholes, P.</b> The effect of the door-to-door tickler chain on the catch rate of plaice ( <i>Pleuronectes platessa</i> L.) taken by an otter trawl. . . . .                             | 210           |
| <b>Kirkerud, L. A.</b> A method for the rapid sorting of plankton into a number of size groups. . . . .                                                                                                             | 367           |
| <b>Langton, R. W. and McKay, G. U.</b> The effect of continuous versus discontinuous feeding on the growth of hatchery reared spat of <i>Crassostrea gigas</i> Thunberg . . . . .                                   | 361           |
| <b>Lindenberg, J. G.</b> Macroplankton sorting aid . . . . .                                                                                                                                                        | 97            |
| <b>Lockwood, S. J.</b> Weight and length changes of 0-group plaice ( <i>Pleuronectes platessa</i> L.) after preservation in 4% neutral formalin . . . . .                                                           | 100           |
| <b>Love, R. M.</b> Colour stability in cod ( <i>Gadus morhua</i> L.) from different grounds. . . . .                                                                                                                | 207           |
| <b>Morcos, S. A.</b> A table for the ionic composition of sea water based on 1967 atomic weights . . . . .                                                                                                          | 94            |
| <b>Nival, P. et Nival, S.</b> Description d'un appareil à fractionner le plancton utilisable à la mer . . . . .                                                                                                     | 98            |
| <b>Szekielda, K.-H.</b> A multichannel approach to monitor sea surface temperature from space along the NW Coast of Africa. . . . .                                                                                 | 363           |
| <b>Reviews</b> . . . . .                                                                                                                                                                                            | 102, 213, 370 |
| <b>Erratum</b> . . . . .                                                                                                                                                                                            | 379           |
| <b>Index</b> . . . . .                                                                                                                                                                                              | 380           |
